# Supplementary material for: Chondroitin sulfate proteoglycan 4 functions as the cellular receptor for Clostridium difficile toxin B
Source: PubMed Central journal article supplement — Cell Res. 2014 Dec 30;25(2):157–68. doi: 10.1038/cr.2014.169 (PMC4650570; doi:10.1038/cr.2014.169), 2014-12-30
Supplement: cr2014169x1.pdf [file cr2014169x1.pdf]

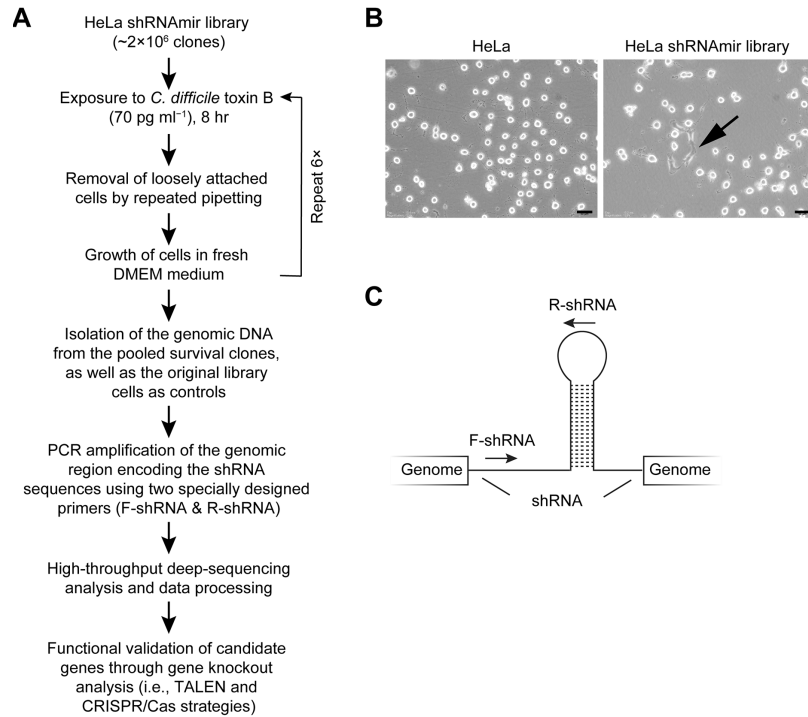

**Supplementary information, Figure S1** shRNAmir library screen for host genes important for TcdB toxicity. **(A)** Schematic of the shRNAmir library screen for human genes important for the toxicity of *C. difficile* toxin B. **(B)** Light microscopic images of HeLa cells after exposure to 70 pg ml<sup>-1</sup> TcdB for 8 hr. The arrow points to cells that remained spindle-shaped after toxin exposure. Scale bar = 50 μm. **(C)** Two specific primers were used to amplify the shRNA-coding sequences from the HeLa shRNA library clones. The F-shRNA primer (5'-ACGTCGAGGTGCCCGAAGGA) matches the sequence upstream of the shRNA stem region, and the R-shRNA primer (5'-TACATCTGTGGCTTCACTA) matches the loop region of the shRNA.
