# Supplementary material for: Chondroitin sulfate proteoglycan 4 functions as the cellular receptor for Clostridium difficile toxin B
Source: PubMed Central journal article supplement — Cell Res. 2014 Dec 30;25(2):157–68. doi: 10.1038/cr.2014.169 (PMC4650570; doi:10.1038/cr.2014.169), 2014-12-30
Supplement: cr2014169x2.pdf [file cr2014169x2.pdf]

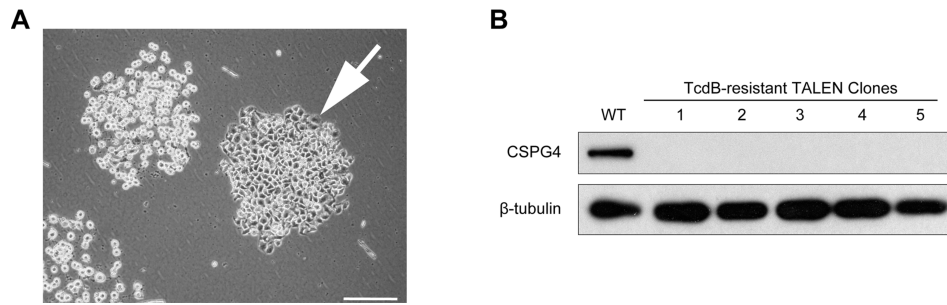

**Supplementary information, Figure S2** Effect of TALEN-mediated CSPG4 knockout on the susceptibility of HeLa cells to TcdB. **(A)** Microscopic image of HeLa cells harbouring the *CSPG4*-targeting TALEN constructs after exposure to  $70 \text{ pg ml}^{-1}$  TcdB for 8 hr. Scale bar:  $200 \text{ }\mu\text{m}$ . The white arrow points to the colony of cells that was toxin resistant. **(B)** Immunoblot analysis of CSPG4 expression in five randomly selected TALEN HeLa cell clones that demonstrated TcdB resistance. A rabbit monoclonal antibody against human CSPG4 was used. The  $\beta$ -tubulin bands were measured as internal controls.
