# Supplementary material for: Chondroitin sulfate proteoglycan 4 functions as the cellular receptor for Clostridium difficile toxin B
Source: PubMed Central journal article supplement — Cell Res. 2014 Dec 30;25(2):157–68. doi: 10.1038/cr.2014.169 (PMC4650570; doi:10.1038/cr.2014.169), 2014-12-30
Supplement: cr2014169x3.pdf [file cr2014169x3.pdf]

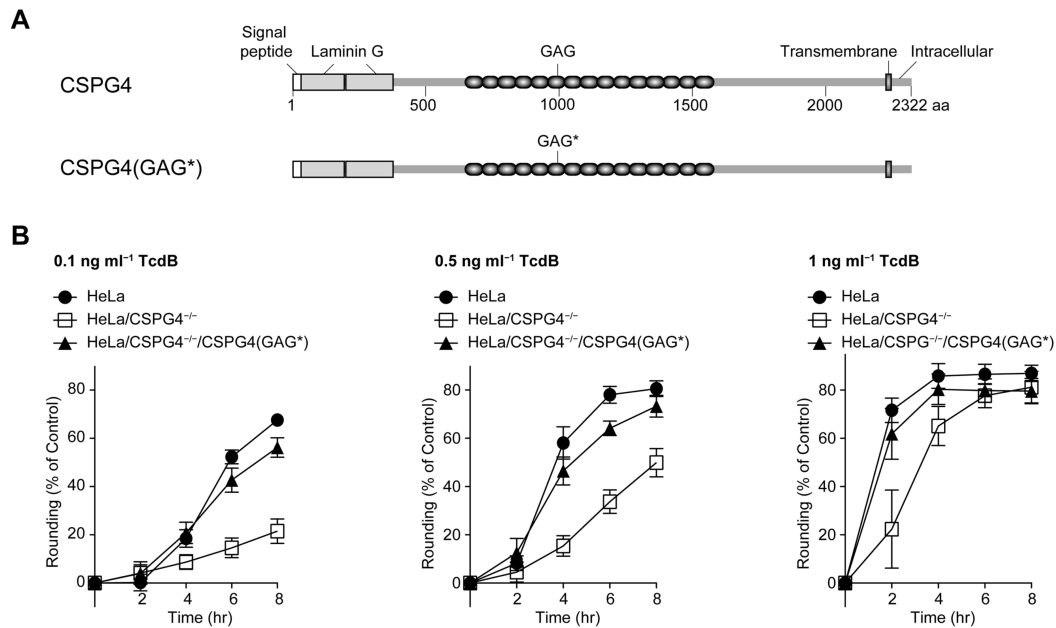

**Supplementary information, Figure S3** GAG is irrelevant to CSPG4's function in mediating TcdB toxicity. **(A)** Multi-domain schematic of CSPG4 and CSPG4 (GAG\*). CSPG4 (GAG\*) is a mutant form of CSPG4 that contains a mutation at the GAG acceptor site (S995A), which abolishes the ability of the CSPG4 protein to bind to chondroitin sulphate glycosaminoglycan (GAG). **(B)** The indicated cells were treated with different concentrations of TcdB and were imaged every 2 hr over an 8-hr time course. The percentage of round cells was quantified according to the procedure described as in **Figure 1F**. The data are the mean  $\pm$  s.d.,  $n = 12$ .
