# Supplementary material for: Chondroitin sulfate proteoglycan 4 functions as the cellular receptor for Clostridium difficile toxin B
Source: PubMed Central journal article supplement — Cell Res. 2014 Dec 30;25(2):157–68. doi: 10.1038/cr.2014.169 (PMC4650570; doi:10.1038/cr.2014.169), 2014-12-30
Supplement: cr2014169x4.pdf [file cr2014169x4.pdf]

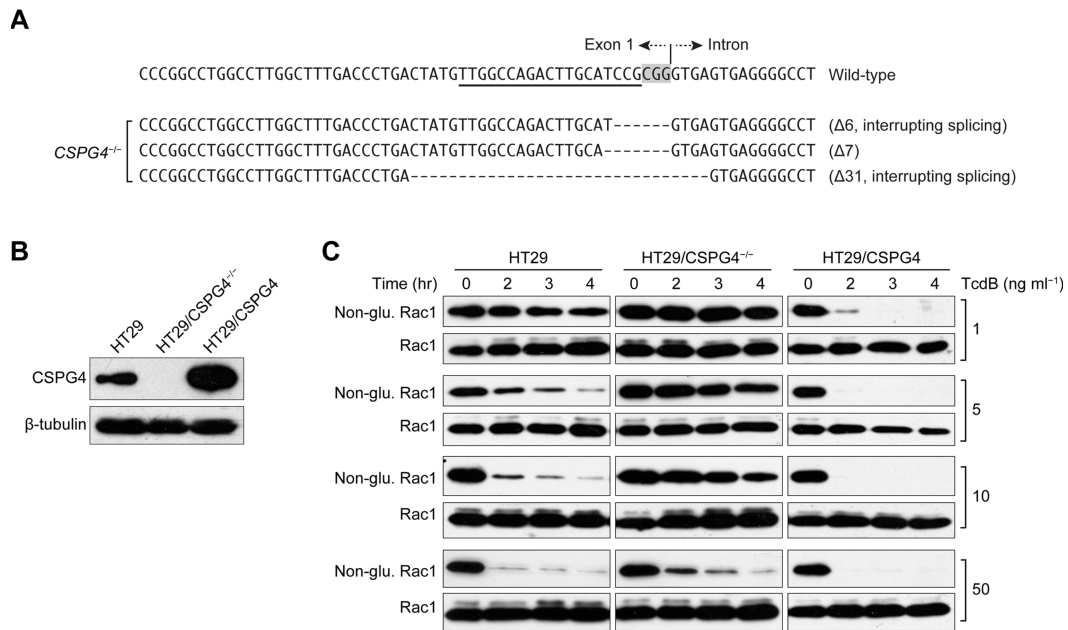

**Supplementary information, Figure S4** Effect of CSPG4 expression on the susceptibility of HT29 cells to TcdB toxicity. **(A)** Partial coding sequences of the *CSPG4* gene in the genome containing the CRISPR/Cas9 sgRNA binding region (underlined) and sequencing analysis of the mutated alleles from 8 randomly selected clones. The shaded nucleotides represent the PAM sequence that guides the Cas9 for DNA recognition and cleavage. The exon and intron close to the sgRNA targeting region are indicated, and the dashes indicate deletions. **(B)** Immunoblot analysis of the indicated HT29 cells, following the same method described in **Figure 1C**. A rabbit monoclonal antibody against human CSPG4 was used. **(C)** Immunoblot analysis of the total and non-glycosylated Rac1 in the indicated HT29 cells. Cells were treated for increasing time intervals with four different concentrations of TcdB (1, 5, 10 and 50 ng ml<sup>-1</sup>).
