# Supplementary material for: Chondroitin sulfate proteoglycan 4 functions as the cellular receptor for Clostridium difficile toxin B
Source: PubMed Central journal article supplement — Cell Res. 2014 Dec 30;25(2):157–68. doi: 10.1038/cr.2014.169 (PMC4650570; doi:10.1038/cr.2014.169), 2014-12-30
Supplement: cr2014169x5.pdf [file cr2014169x5.pdf]

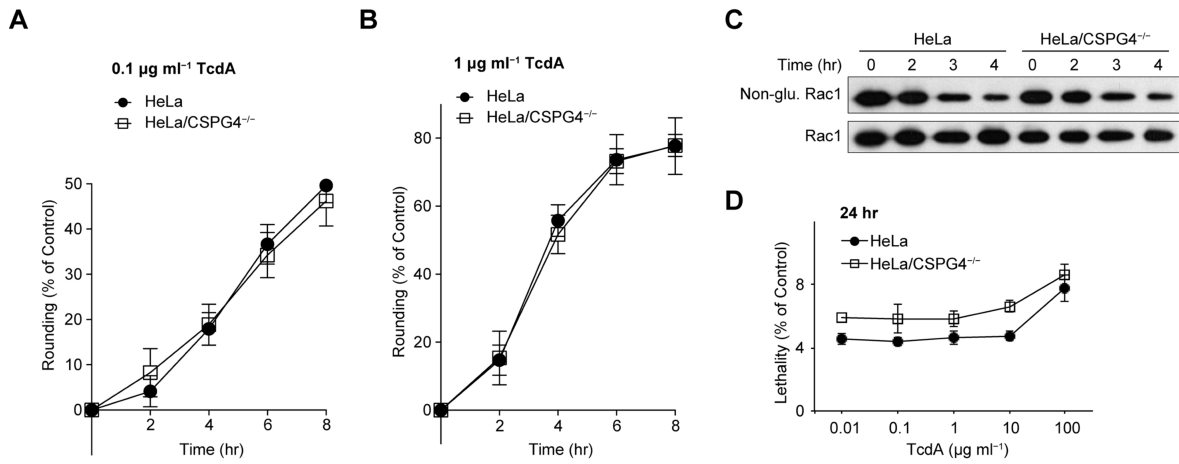

**Supplementary information, Figure S5** CSPG4 has no effect on TcdA-mediated toxicity. **(A-B)** The indicated HeLa cells were treated with 0.1  $\mu\text{g ml}^{-1}$  **(A)** or 1  $\mu\text{g ml}^{-1}$  **(B)** TcdA and were imaged every 2 hr over an 8 hr time course. Cell rounding analysis was performed as described in **Figure 1F**. The data are the mean  $\pm$  s.d.,  $n = 12$ . **(C)** Immunoblot analysis of total Rac1 and non-glycosylated (non-glu.) Rac1 in the indicated HeLa cells, which were treated for increasing time intervals with 0.5  $\mu\text{g ml}^{-1}$  TcdA. Total Rac1 was detected using an antibody targeting both the glycosylated and non-glycosylated Rac1 to ensure equal loading. **(D)** The indicated HeLa cells were treated with serially increasing amounts of TcdA (0.01 - 100  $\mu\text{g ml}^{-1}$ ) for 24 hr prior to the LDH cytotoxicity assay. The data are the mean  $\pm$  s.d.,  $n = 3$ .
