# Supplementary material for: Chondroitin sulfate proteoglycan 4 functions as the cellular receptor for Clostridium difficile toxin B
Source: PubMed Central journal article supplement — Cell Res. 2014 Dec 30;25(2):157–68. doi: 10.1038/cr.2014.169 (PMC4650570; doi:10.1038/cr.2014.169), 2014-12-30
Supplement: cr2014169x6.pdf [file cr2014169x6.pdf]

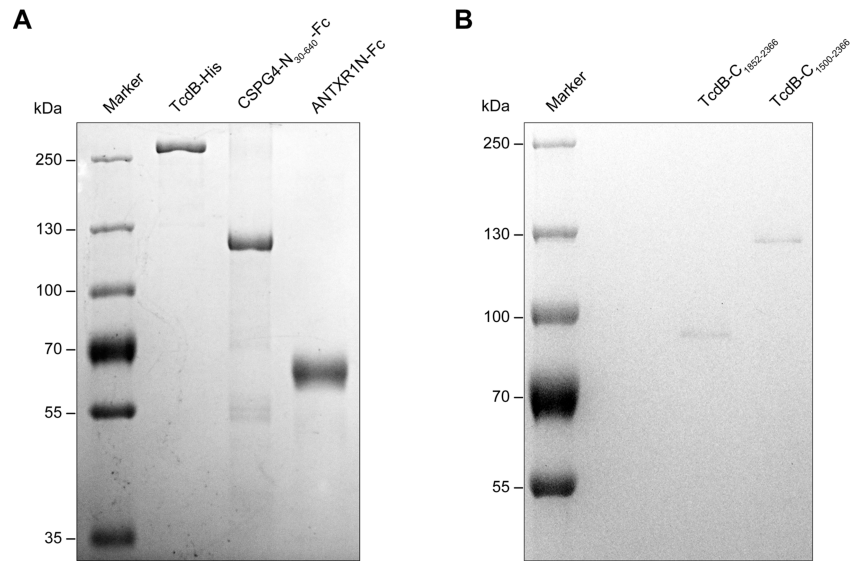

**Supplementary information, Figure S6** Production and purification of proteins. **(A)** Coomassie blue staining of the purified TcdB-His, CSPG4-N<sub>30-640</sub>-Fc, and ANTXR1N-Fc following SDS-PAGE analysis. **(B)** Coomassie blue staining of the purified TcdB-C<sub>1852-2366</sub> and TcdB-C<sub>1500-2366</sub> following SDS-PAGE analysis.
