# Supplementary material for: Chondroitin sulfate proteoglycan 4 functions as the cellular receptor for Clostridium difficile toxin B
Source: PubMed Central journal article supplement — Cell Res. 2014 Dec 30;25(2):157–68. doi: 10.1038/cr.2014.169 (PMC4650570; doi:10.1038/cr.2014.169), 2014-12-30
Supplement: cr2014169x7.pdf [file cr2014169x7.pdf]

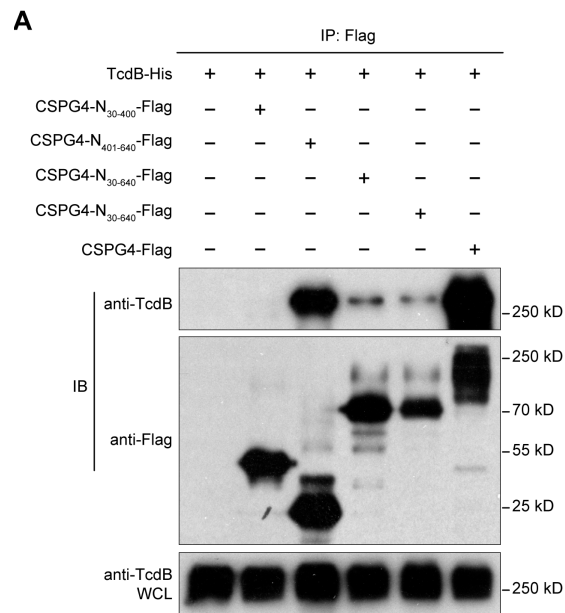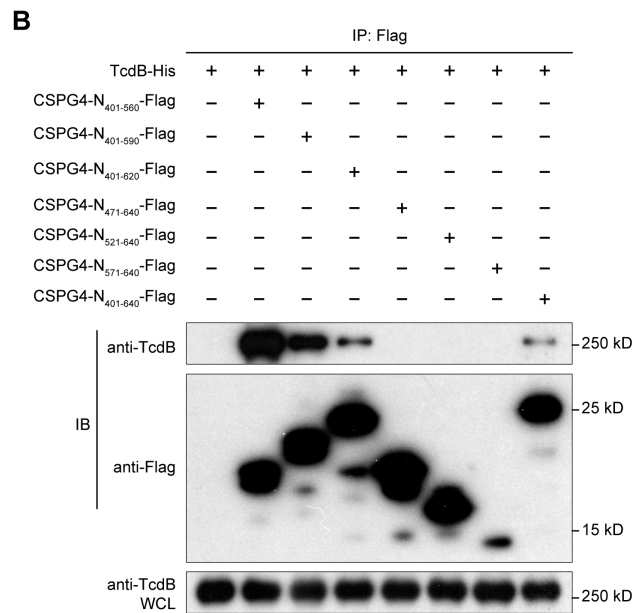

**Supplementary information, Figure S7** Coimmunoprecipitation of TcdB-His with the indicated CSPG4 proteins in HEK293T cells transfected with indicated Flag-CSPG4 constructs. Immunoblotting analysis was conducted using anti-Flag and anti-TcdB antibodies after co-incubation of the cell lysates with 5  $\mu$ g of TcdB at 4°C overnight. CSPG4-N<sub>30-640</sub> proteins extracted from two independent-acquired clones were used for better representation (**A**).
