# Supplementary material for: Chondroitin sulfate proteoglycan 4 functions as the cellular receptor for Clostridium difficile toxin B
Source: PubMed Central journal article supplement — Cell Res. 2014 Dec 30;25(2):157–68. doi: 10.1038/cr.2014.169 (PMC4650570; doi:10.1038/cr.2014.169), 2014-12-30
Supplement: cr2014169x8.pdf [file cr2014169x8.pdf]

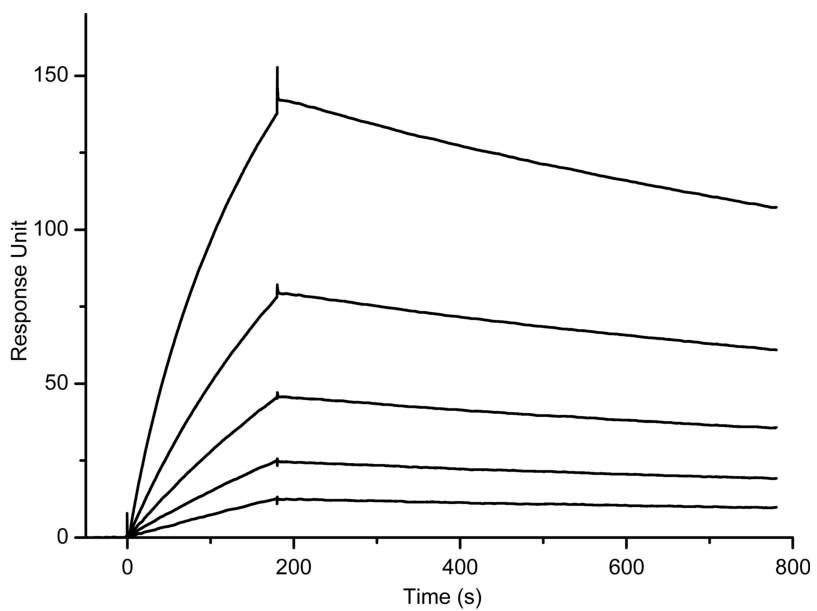

**Supplementary information, Figure S8** Surface plasmon resonance (SPR) measurements for the binding constant between TcdB and CSPG4-N<sub>401-560</sub>.
